# Supplementary material
Source: publisher figshare collection journal article supplement (https://acs.figshare.com/ndownloader/files/5107768)
Supplement: Supplementary file 1 [file 5107768]

## Palladium-catalyzed cross-coupling in the synthesis of pyridinyl boxazomycin C analogues

Chris Richardson,<sup>§</sup> Gordon W. Rewcastle,<sup>\*,§</sup> Denton Hoyer,<sup>#</sup> and William A. Denny<sup>§</sup>

*Auckland Cancer Society Research Centre, Faculty of Medical and Health Sciences, The University of Auckland, Private Bag 92019, Auckland 1020, New Zealand, and Pfizer Global Research and Development, Ann Arbor Laboratories, 2800 Plymouth Rd., Ann Arbor, Michigan, 48106-1047, USA.*  
g.rewcastle@auckland.ac.nz

## Contents

|                               |         |
|-------------------------------|---------|
| Spectral data for compound 4  | S2-S4   |
| Spectral data for compound 6  | S5-S7   |
| Spectral data for compound 8  | S8-S10  |
| Spectral data for compound 10 | S11-S13 |
| Spectral data for compound 11 | S14-S16 |

S2

CR 1\_083\_1

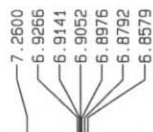

3.7412

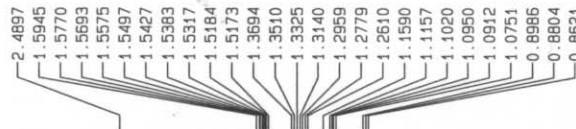

## Current Data Parameters

NAME cr1030721  
EXPNO 1  
PROCNO 1

## F2 - Acquisition Parameters

Date\_ 20030721  
Time 8.29  
INSTRUM spect  
PROBHD 5 mm BBO BB-1H  
PULPROG zg30  
TD 65536  
SOLVENT cdc13  
NS 16  
DS 2  
SWH 8389.262 Hz  
FIDRES 0.128010 Hz  
AQ 3.9059956 sec  
RG 181  
DW 59.600 usec  
DE 10.00 usec  
TE 300.0 K  
D1 2.00000000 sec

## ===== CHANNEL f1 =====

NUC1 1H  
P1 9.50 usec  
PL1 -3.00 dB  
SF01 400.1334011 MHz

## F2 - Processing parameters

SI 32768  
SF 400.1300092 MHz  
WDW EM  
SSB 0  
LB 0.30 Hz  
GB 0  
PC 1.00

## 1D NMR plot parameters

CX 22.00 cm  
CY 12.00 cm  
F1P 10.000 ppm  
F1 4001.30 Hz  
F2P -1.000 ppm  
F2 -400.13 Hz  
PPMCM 0.50000 ppm/cm  
HZCM 200.06497 Hz/cm

# <sup>1</sup>H NMR spectrum of Compound 4

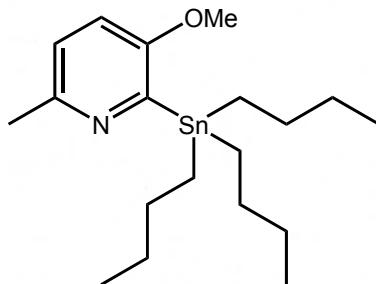

1.3187

1.9706

1.9840

4.8282

4.4912

0.4813

3.3623

0.4348

6.1816

S3

# <sup>13</sup>C NMR spectrum of Compound 4

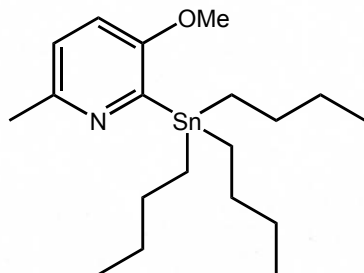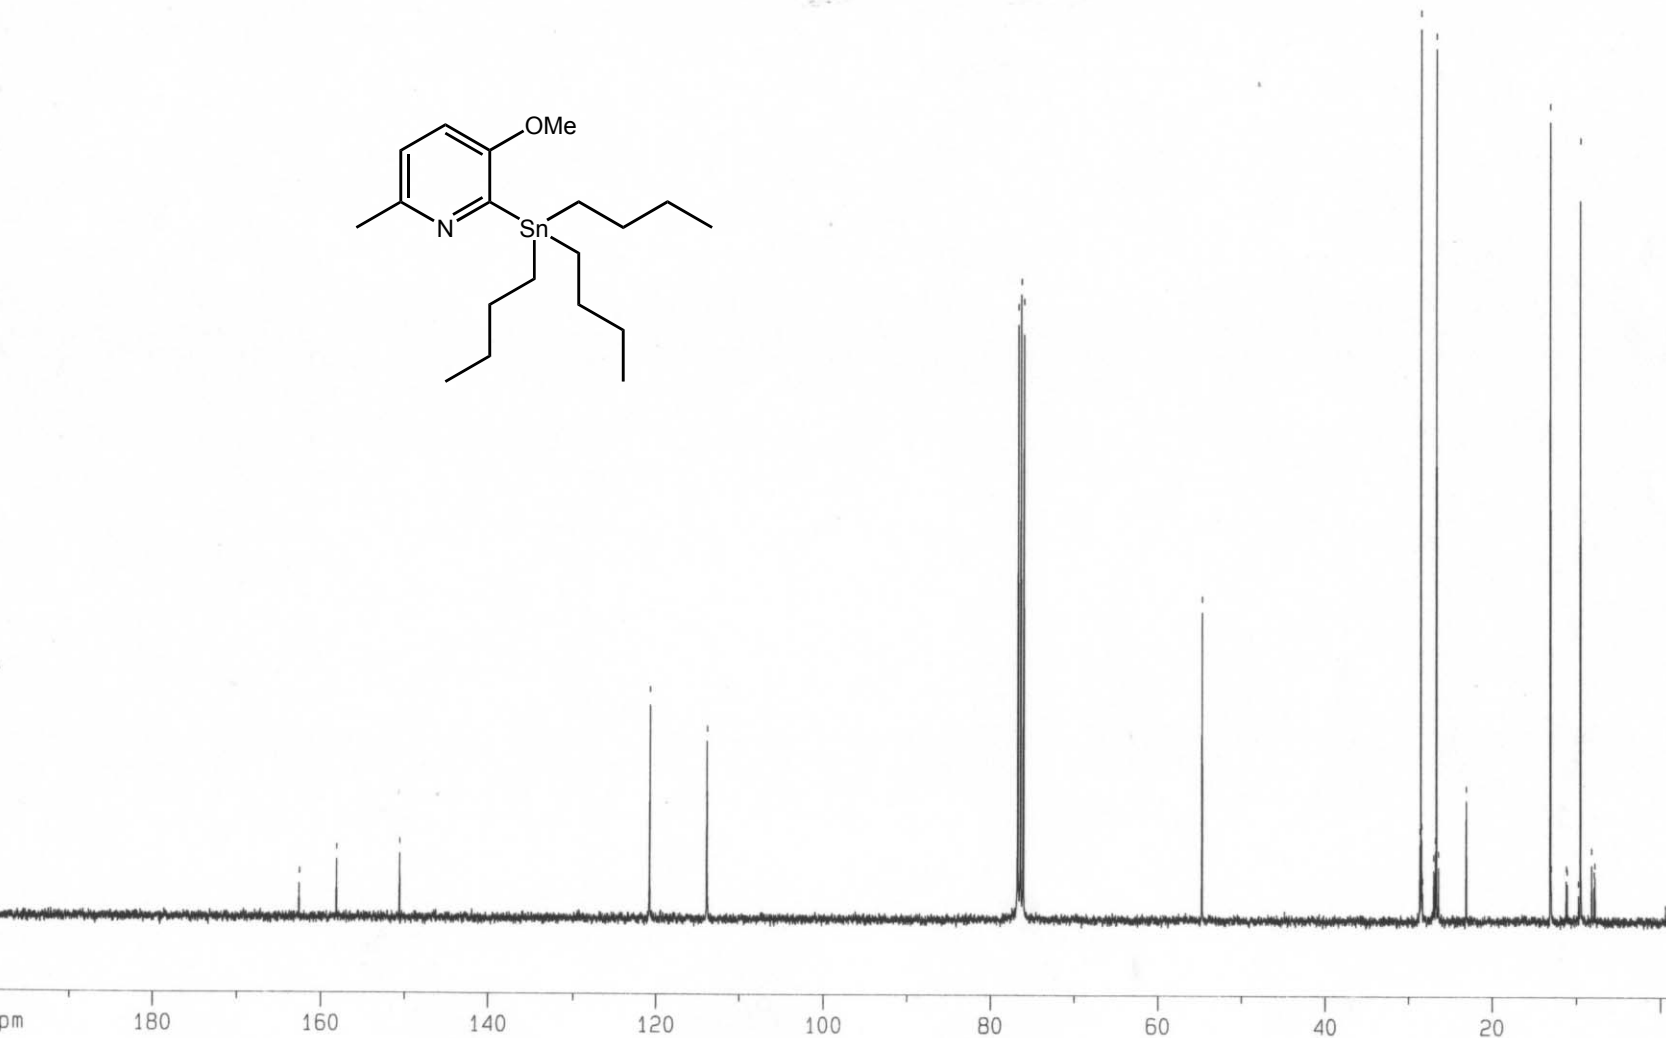

Current Data Parameters  
NAME cr1050211  
EXPNO 23  
PROCNO 1

F2 - Acquisition Parameters  
Date\_ 20050214  
Time 12.34  
INSTRUM spect  
PROBHD 5 mm BBO BB-1H  
PULPROG zgpg  
TD 65536  
SOLVENT dmsd  
NS 2200  
DS 0  
SWH 23980.814 Hz  
FIDRES 0.365918 Hz  
AQ 1.3664756 sec  
RG 1625.5  
DW 20.850 usec  
DE 6.50 usec  
TE 300.0 K  
D1 0.75000000 sec  
d11 0.03000000 sec  
d12 0.00002000 sec

===== CHANNEL f1 =====  
NUC1 13C  
P1 6.26 usec  
PL1 -1.00 dB  
SF01 100.6239378 MHz

===== CHANNEL f2 =====  
CPDPRG2 waltz16  
NUC2 1H  
PCPD2 100.00 usec  
PL2 -3.00 dB  
PL12 17.50 dB  
PL13 19.00 dB  
SF02 400.1318006 MHz

F2 - Processing parameters  
SI 32768  
SF 100.6128242 MHz  
WDW EM  
SSB 0  
LB 1.00 Hz  
GB 0  
PC 1.40

1D NMR plot parameters  
CX 22.00 cm  
CY 11.87 cm  
F1P 200.000 ppm  
F1 20122.56 Hz  
F2P -1.000 ppm  
F2 -100.61 Hz  
PPMCM 9.13636 ppm/  
HZCM 919.23529 Hz/c

# Mass spectrum of Compound 4

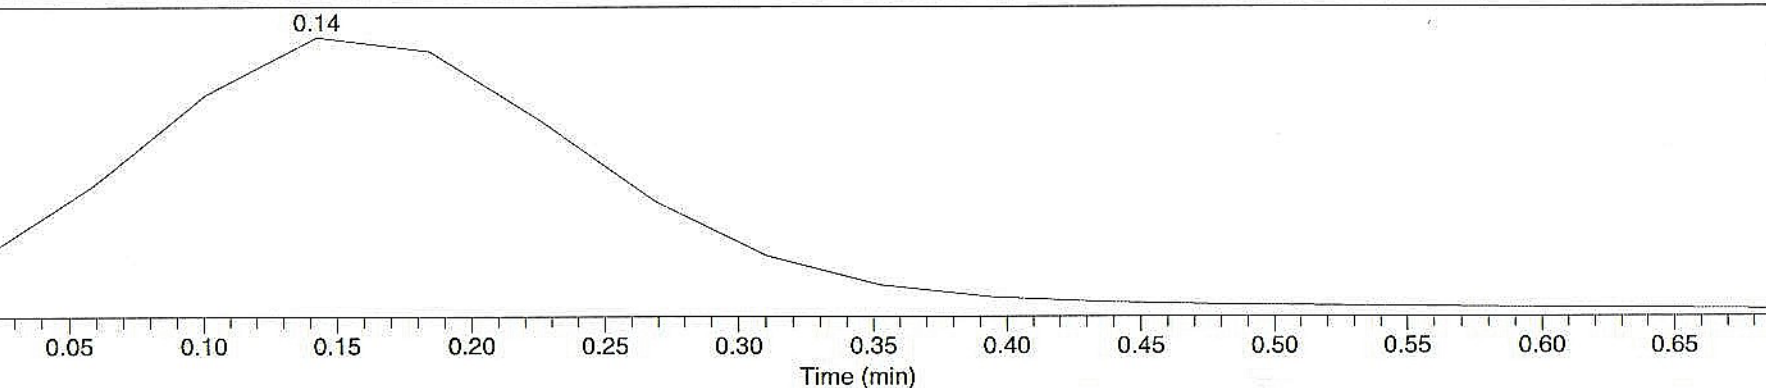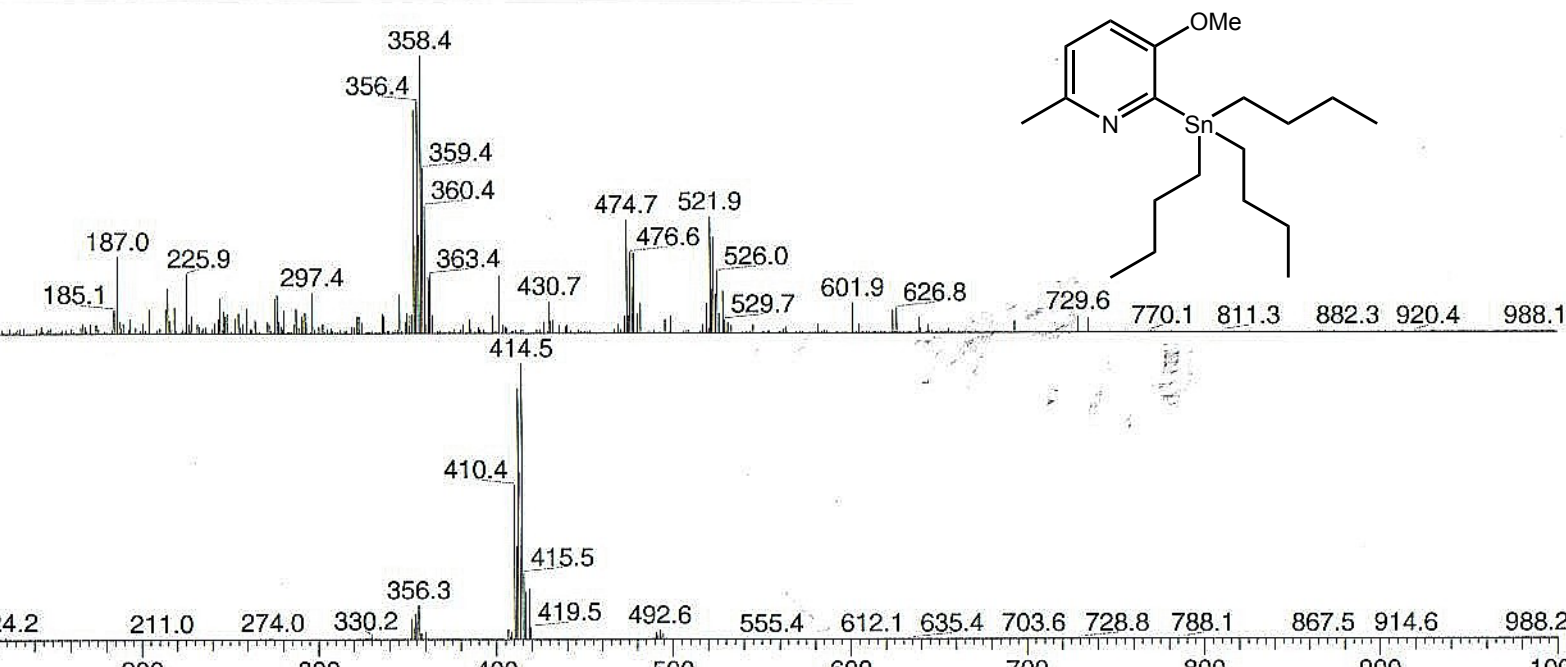

Vial71#7-10 RT: 0.12-0.16  
2 0.02 , 0.54-0.60 NL: 3.90  
{0,0} - c APCI corona sid=50  
det=1400.00 Full ms [  
100.00-1000.00]

Vial71#6-10 RT: 0.10-0.18  
3 0.02 , 0.54-0.60 NL: 8.43  
{0,1} + c APCI corona sid=50  
det=1400.00 Full ms [  
100.00-1000.00]

S5

# <sup>1</sup>H NMR spectrum of Compound 6

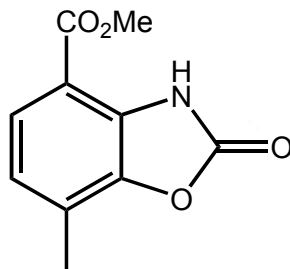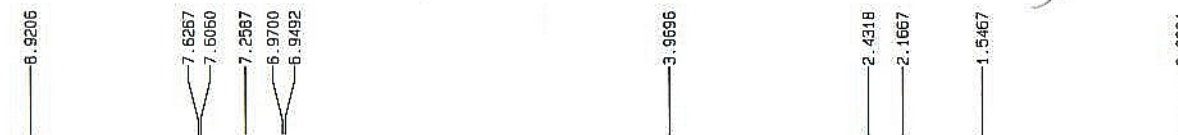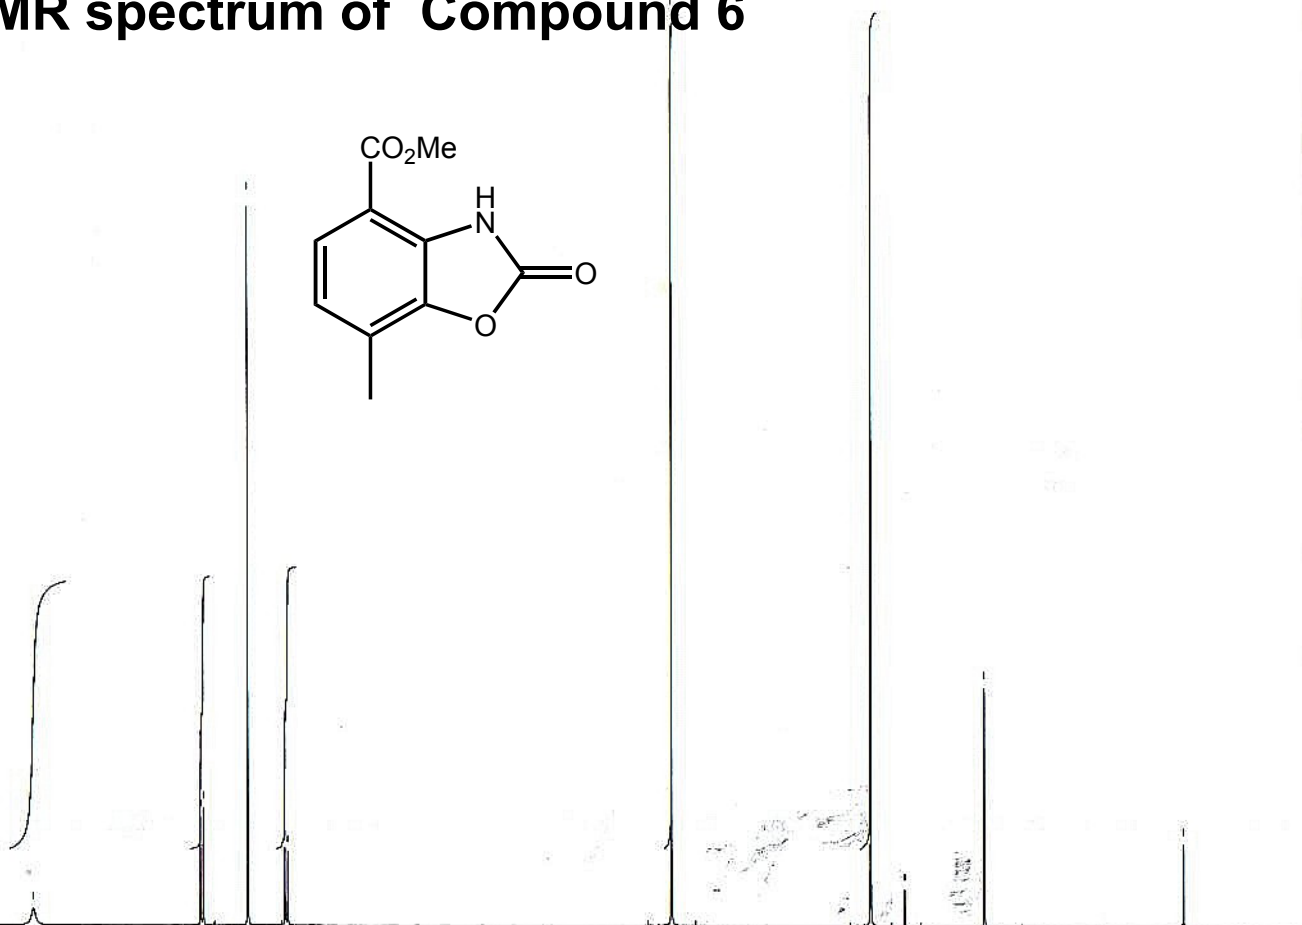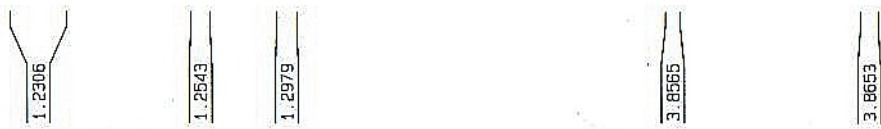

Current Data Parameters  
NAME Apr11-2003-ACSRC  
EXPNO 8  
PROCNO 1

F2 - Acquisition Parameters  
Date\_ 20030411  
Time 13.43  
INSTRUM spect  
PROBHD 5 mm BBO BB-1H  
PULPROG zg30  
TD 65536  
SOLVENT COC13  
NS 32  
DS 2  
SWH 8278.146 Hz  
FIDRES 0.126314 Hz  
AQ 3.9584243 sec  
RG 455.1  
DW 60.400 usec  
DE 10.00 usec  
TE 300.0 K  
D1 2.00000000 sec

===== CHANNEL f1 =====  
NUC1 1H  
P1 10.20 usec  
PL1 -3.00 dB  
SF01 400.1336412 MHz

F2 - Processing parameters  
SI 32768  
SF 400.1300996 MHz  
WDW EM  
SSB 0  
LB 0.30 Hz  
GB 0  
PC 1.00

1D NMR plot parameters  
CX 22.00 cm  
CY 12.00 cm  
F1P 12.000 ppm  
F1 4801.56 Hz  
F2P -1.000 ppm  
F2 -400.13 Hz  
PPMCM 0.59091 ppm/cm  
HZCM 235.44048 Hz/cm

S6

 **$^{13}\text{C}$  NMR spectrum of Compound 6**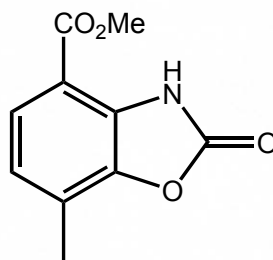

Current Data Parameters  
NAME cr099  
EXPNO 2  
PROCNO 1

F2 - Acquisition Parameters  
Date\_ 20050208  
Time 14.57  
INSTRUM spect  
PROBHD 5 mm BBO BB-1H  
PULPROG zgpg  
TD 65536  
SOLVENT dms  
NS 1000  
DS 0  
SWH 23980.814 Hz  
FIDRES 0.365918 Hz  
AQ 1.3664756 sec  
RG 9195.2  
DM 20.850 usec  
DE 6.50 usec  
TE 300.0 K  
D1 0.75000000 sec  
d11 0.03000000 sec  
d12 0.00002000 sec

===== CHANNEL f1 =====  
NUC1  $^{13}\text{C}$   
P1 6.26 usec  
PL1 -1.00 dB  
SF01 100.6239378 MHz

===== CHANNEL f2 =====  
CPDPRG2 waltz16  
NUC2  $^1\text{H}$   
PCPD2 100.00 usec  
PL2 -3.00 dB  
PL12 17.50 dB  
PL13 19.00 dB  
SF02 400.1318006 MHz

F2 - Processing parameters  
SI 32768  
SF 100.6127693 MHz  
WDW EM  
SSB 0  
LB 1.00 Hz  
GB 0  
PC 1.40

1D NMR plot parameters  
CX 22.00 cm  
CY 15.95 cm  
F1P 200.000 ppm  
F1 20122.55 Hz  
F2P -1.000 ppm  
F2 -100.61 Hz  
PPMCH 9.13636 ppm  
HZCM 919.23480 Hz/

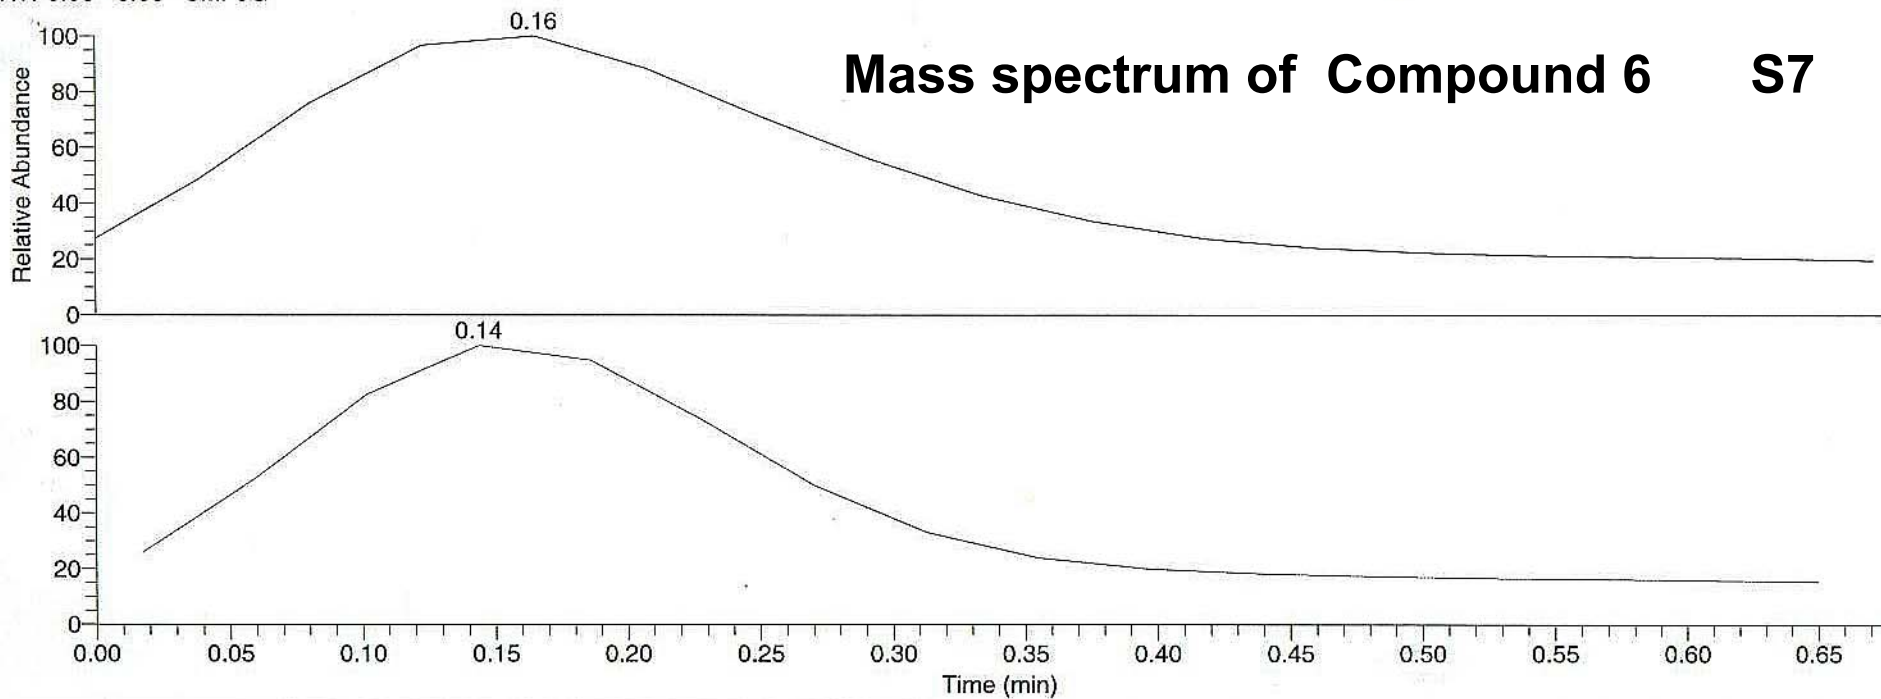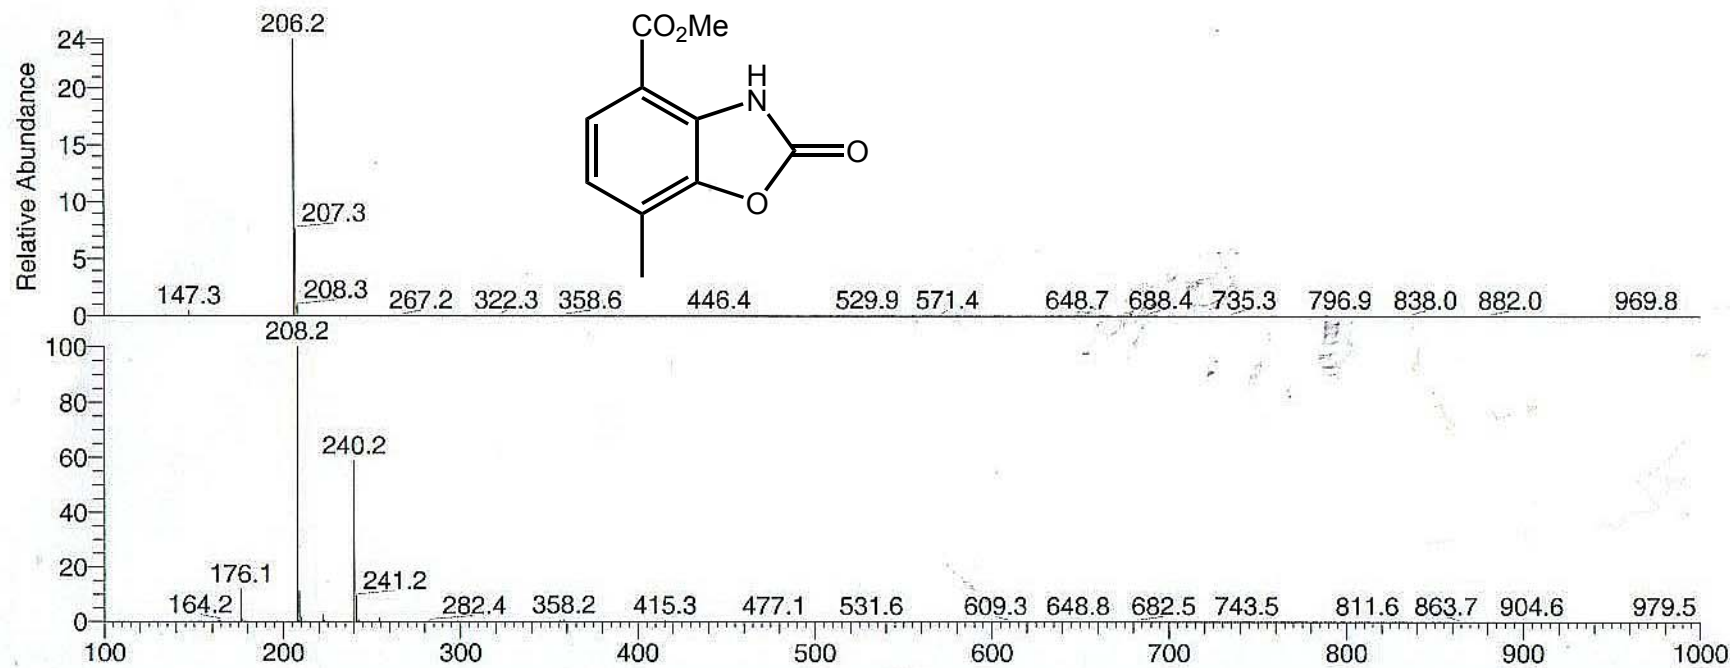

Vial09\_05011  
0.12-0.21 AV  
4.56E6 F: {0,  
sid=50.00 de  
100.00-1000.

Vial09\_05011  
0.10-0.19 AV  
1.87E7 F: {0,  
sid=50.00 de  
100.00-1000.

S8

13.663

7.697  
7.676  
7.207  
7.206  
7.187  
7.186

4.074  
3.909  
3.892  
3.851  
3.704  
3.450  
3.433  
3.302  
2.602  
2.511  
2.507  
2.502  
2.497  
2.493  
2.443  
2.280  
2.085  
1.332  
1.074  
1.057  
1.039

<sup>1</sup>H NMR spectrum of Compound 8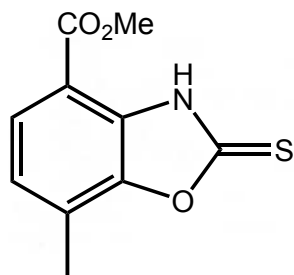

Current Data Parameters  
NAME Jun17-2003-ACSRC  
EXPNO 38  
PROCNO 1

F2 - Acquisition Parameters  
Date\_ 20030617  
Time 15.26  
INSTRUM spect  
PROBHD 5 mm BBO BB-1H  
PULPROG zg30  
TD 65536  
SOLVENT DMSO  
NS 32  
DS 2  
SWH 8278.146 Hz  
FIDRES 0.126314 Hz  
AQ 3.9584243 sec  
RG 287.4  
DW 60.400 usec  
DE 10.00 usec  
TE 300.0 K  
D1 2.00000000 sec

\*\*\*\*\* CHANNEL f1 \*\*\*\*\*  
NUC1 1H  
P1 9.50 usec  
PL1 -3.00 dB  
SF01 400.1336412 MHz

F2 - Processing parameters  
SI 32768  
SF 400.1300018 MHz  
WDW EM  
SSB 0  
LB 0.30 Hz  
GB 0  
PC 1.00

1D NMR plot parameters  
CX 22.00 cm  
CY 12.00 cm  
F1P 16.000 ppm  
F1 6402.08 Hz  
F2P -1.000 ppm  
F2 -400.13 Hz  
PPMCM 0.77273 ppm/cm  
HZCM 309.19138 Hz/cm

0.8777

0.8938

2.6540

2.6512

0.0764

0.7661



S9

<sup>13</sup>C NMR spectrum of Compound 8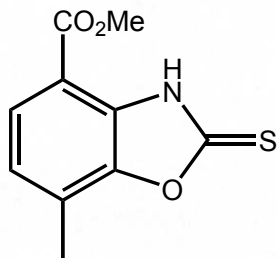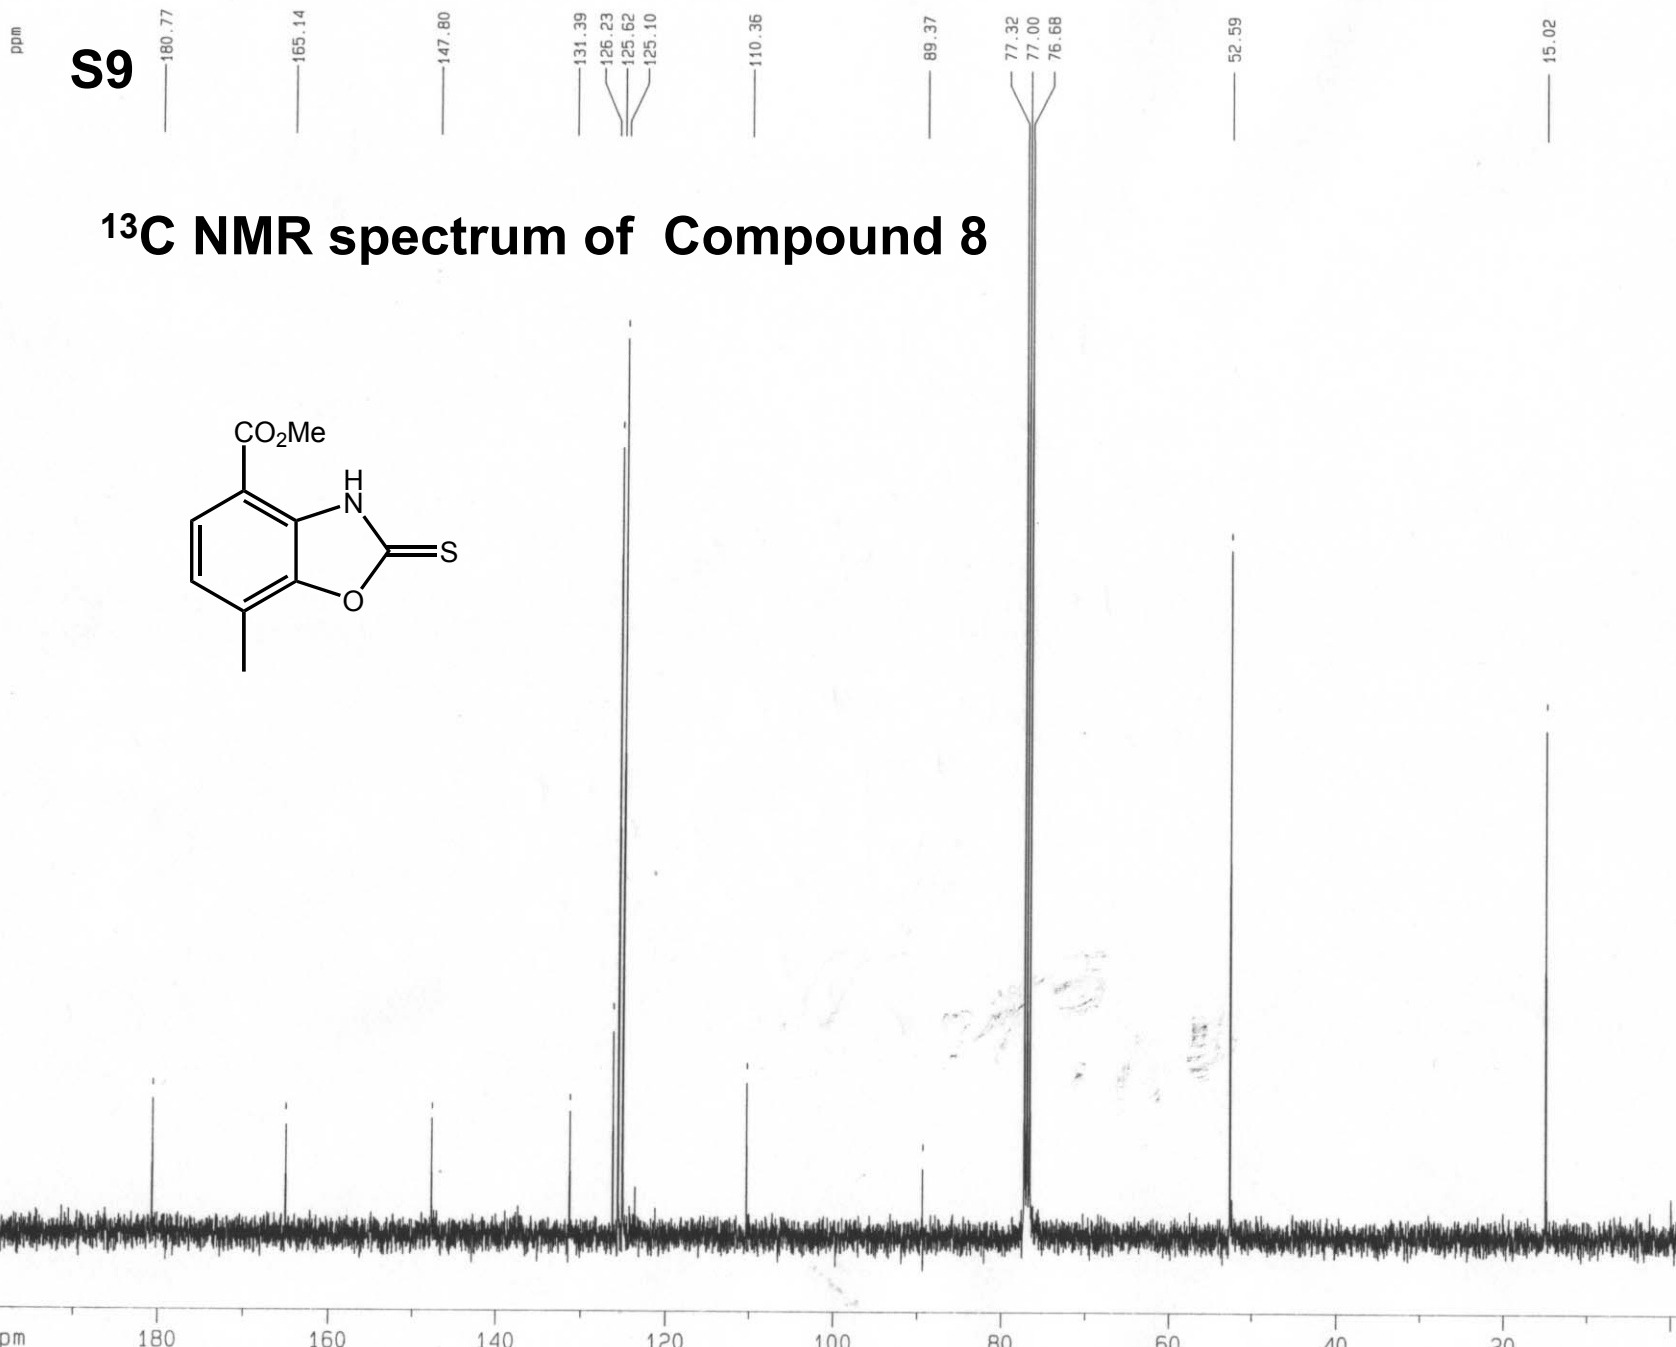

Current Data Parameters  
 NAME cr039  
 EXPNO 4  
 PROCNO 1

F2 - Acquisition Parameters  
 Date\_ 20050204  
 Time 15.24  
 INSTRUM spect  
 PROBHD 5 mm BBO BB-1H  
 PULPROG zgpg  
 TD 65536  
 SOLVENT dms0  
 NS 1000  
 DS 0  
 SWH 25906.736 Hz  
 FIDRES 0.395305 Hz  
 AQ 1.2648948 sec  
 RG 9195.2  
 DW 19.300 usec  
 DE 6.50 usec  
 TE 300.0 K  
 D1 0.75000000 sec  
 d11 0.03000000 sec  
 d12 0.00002000 sec

===== CHANNEL f1 =====  
 NUC1 13C  
 P1 6.26 usec  
 PL1 -1.00 dB  
 SF01 100.6249440 MHz

===== CHANNEL f2 =====  
 CPDPRG2 waltz16  
 NUC2 1H  
 PCPD2 100.00 usec  
 PL2 -3.00 dB  
 PL12 17.50 dB  
 PL13 19.00 dB  
 SF02 400.1318006 MHz

F2 - Processing parameters  
 SI 32768  
 SF 100.6127702 MHz  
 WDW EM  
 SSB 0  
 LB 1.00 Hz  
 GB 0  
 PC 1.40

1D NMR plot parameters  
 CX 22.00 cm  
 CY 20.17 cm  
 F1P 200.000 ppm  
 F1 20122.55 Hz  
 F2P -1.000 ppm  
 F2 -100.61 Hz  
 PPMCM 9.13636 ppm/  
 HZCM 919.23480 Hz/c

# Mass spectrum of Compound 8

S10

NL: 2.31E6  
TIC F: {0,0}  
corona sid=  
det=1212.00  
100.00-1000  
Vial43

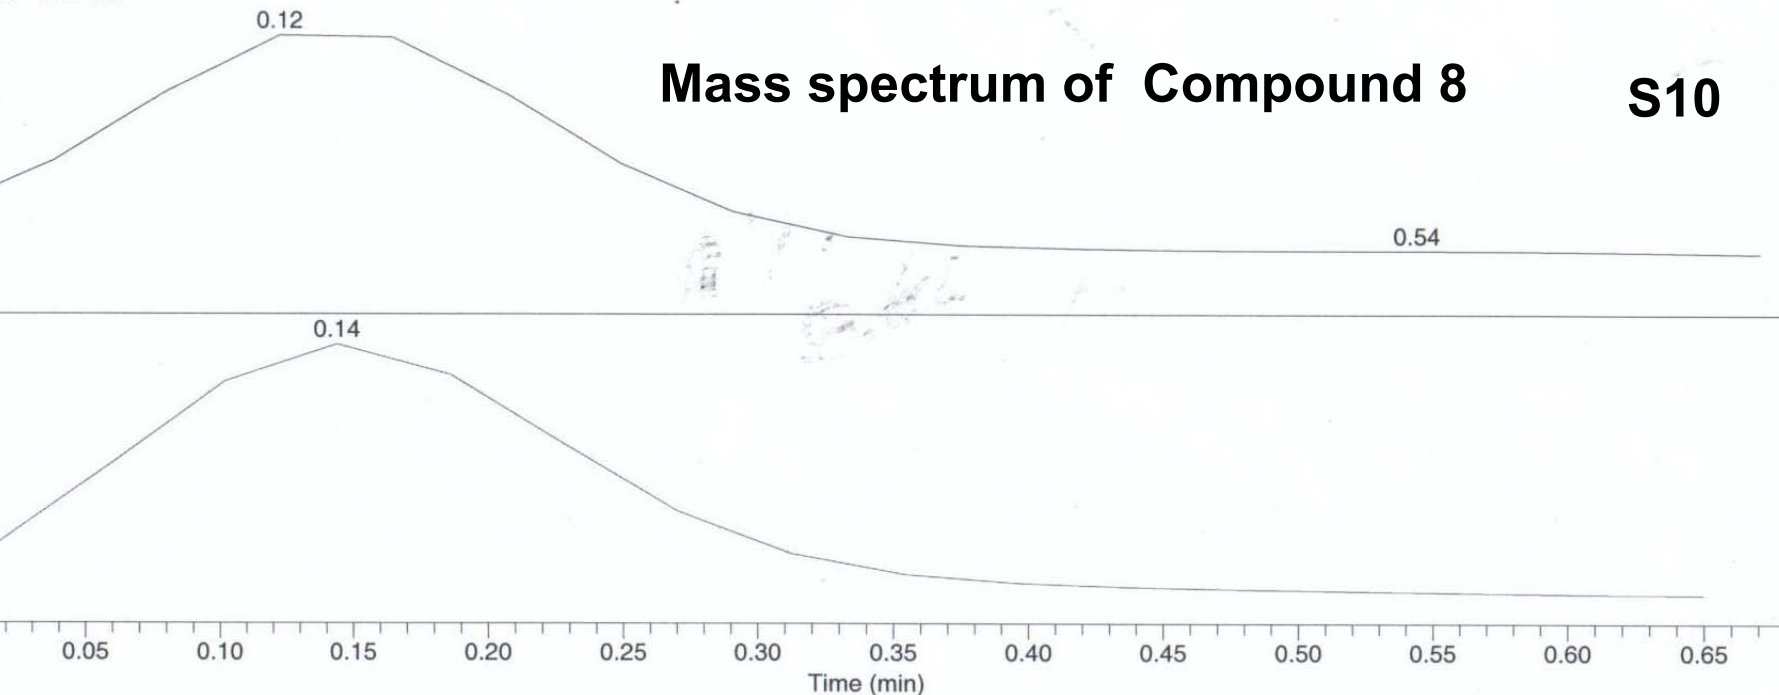

NL: 2.64E7  
TIC F: {0,1}  
corona sid=  
det=1212.00  
100.00-1000  
Vial43

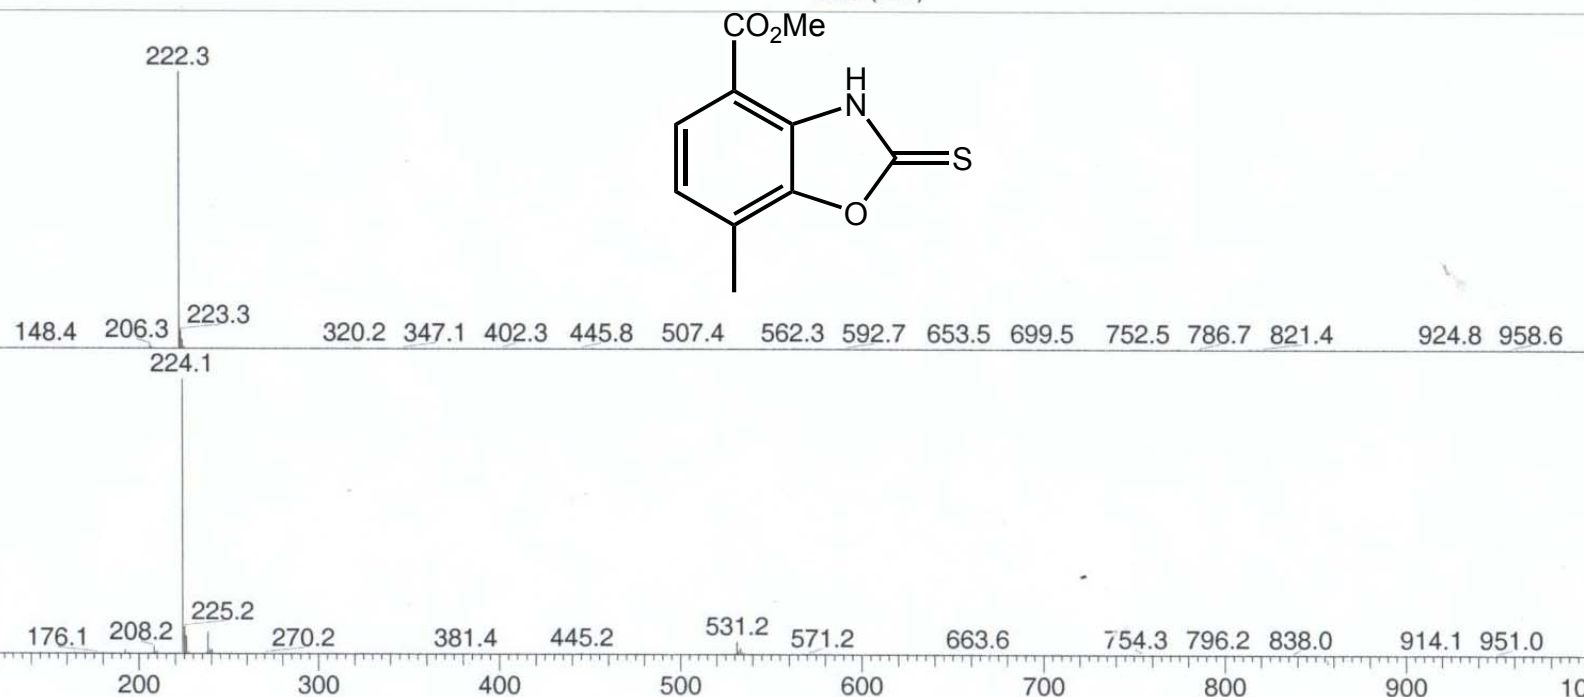

Vial43#6-11 RT: 0.12-0.2  
SB: 2 0.54-0.61 NL: 2.33  
{0,0} - c APCI corona sid=  
det=1212.00 Full ms [  
100.00-1000.00]

Vial43#6-11 RT: 0.10-0.1  
SB: 2 0.54-0.61 NL: 2.35  
{0,1} + c APCI corona sid=  
det=1212.00 Full ms [  
100.00-1000.00]

S11

<sup>1</sup>H NMR spectrum of Compound 10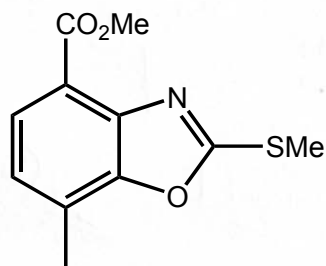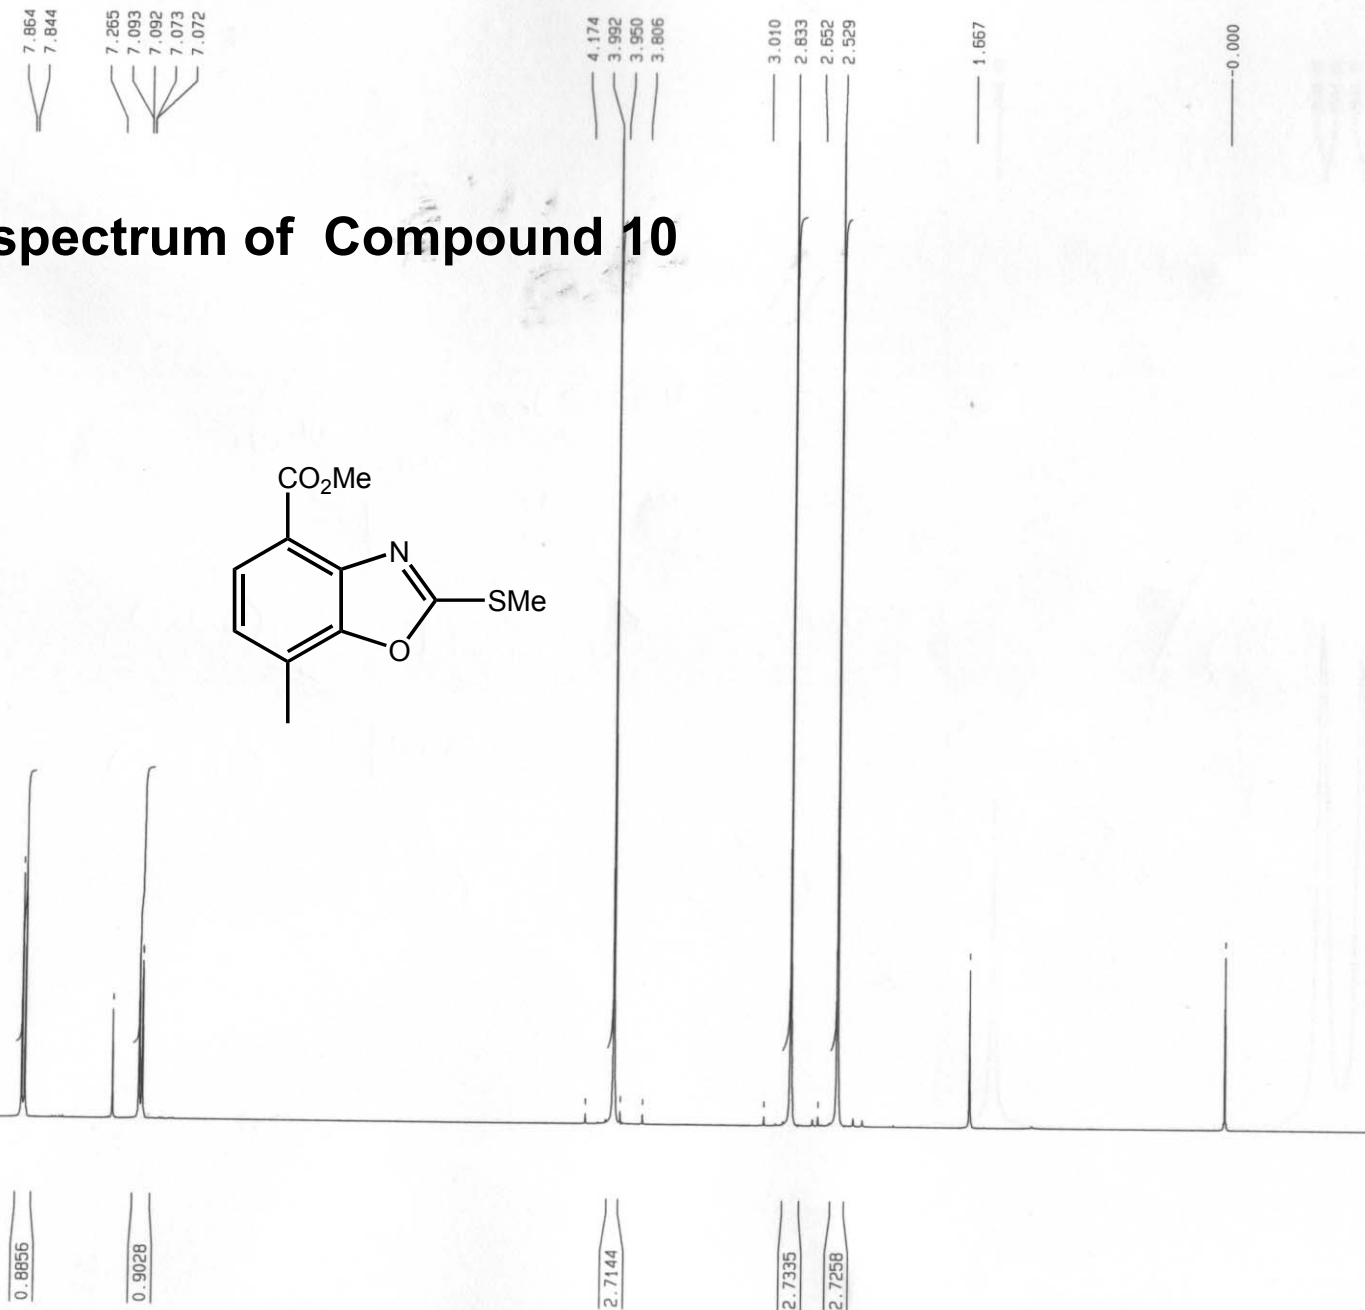

Current Data Parameters  
NAME cr053  
EXPNO 1  
PROCNO 1

F2 - Acquisition Parameters  
Date\_ 20050204  
Time 10.57  
INSTRUM spect  
PROBHD 5 mm BBO BB-1H  
PULPROG zg30  
TD 65536  
SOLVENT DMSO  
NS 32  
DS 2  
SWH 8389.262 Hz  
FIDRES 0.128010 Hz  
AQ 3.9059956 sec  
RG 181  
DW 59.600 usec  
DE 10.00 usec  
TE 300.0 K  
D1 2.0000000 sec

===== CHANNEL f1 =====  
NUC1 1H  
P1 9.50 usec  
PL1 -3.00 dB  
SFO1 400.1334011 MHz

F2 - Processing parameters  
SI 32768  
SF 400.1300073 MHz  
WDW EM  
SSB 0  
LB 0.30 Hz  
GB 0  
PC 1.00

1D NMR plot parameters  
CX 22.00 cm  
CY 25.00 cm  
F1P 10.000 ppm  
F1 4001.30 Hz  
F2P -1.000 ppm  
F2 -400.13 Hz  
PPMCM 0.50000 ppm/c  
HZCM 200.06500 Hz/cm

S12

<sup>13</sup>C NMR spectrum of Compound 10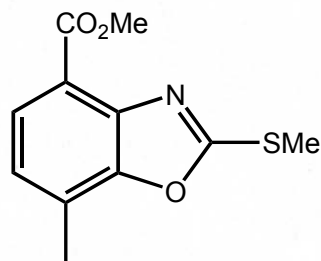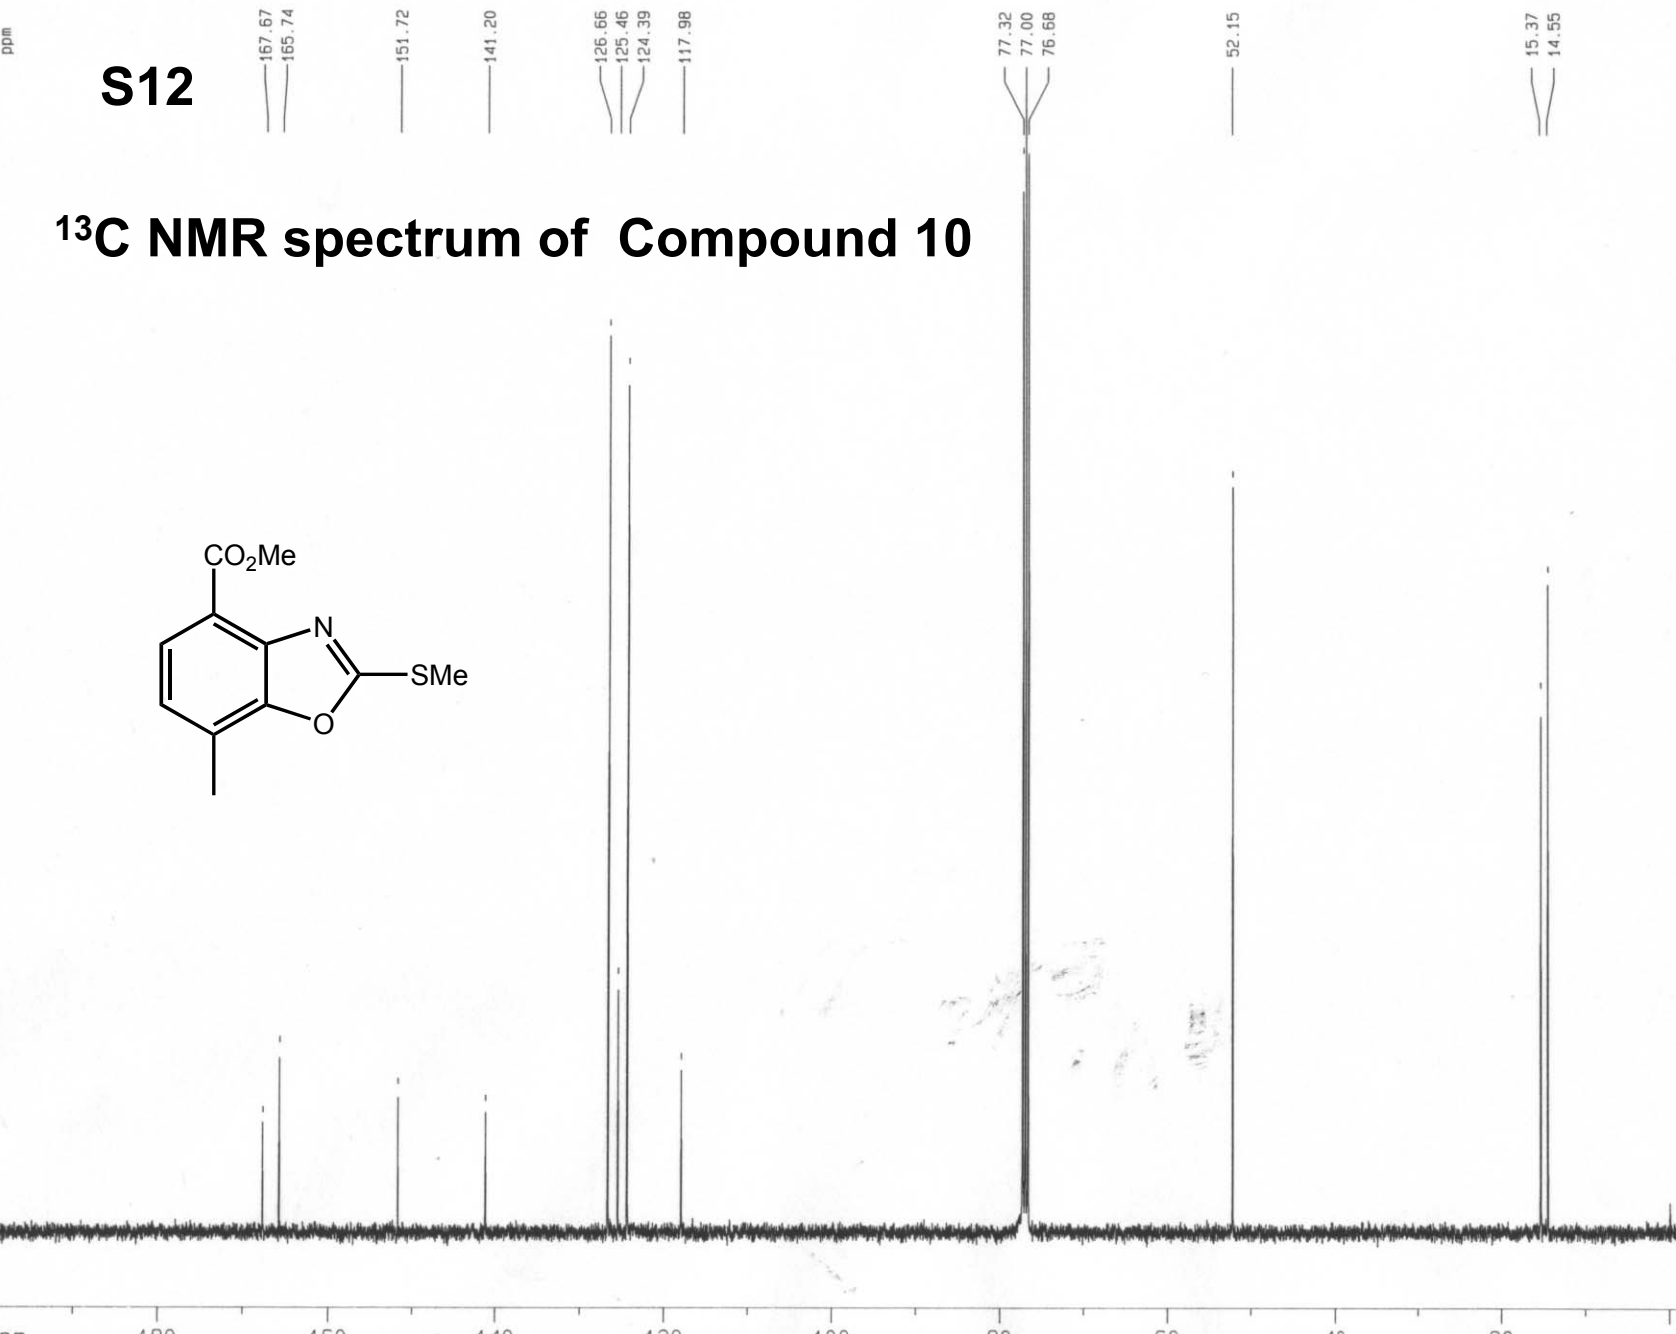

Current Data Parameters  
NAME cr053  
EXPNO 5  
PROCNO 1

F2 - Acquisition Parameters  
Date\_ 20050204  
Time 12.07  
INSTRUM spect  
PROBHD 5 mm BBO BB-1H  
PULPROG zgpg  
TD 65536  
SOLVENT dms  
NS 2000  
DS 0  
SWH 23980.814 Hz  
FIDRES 0.365918 Hz  
AQ 1.3664756 sec  
RG 9195.2  
DW 20.850 usec  
DE 6.50 usec  
TE 300.0 K  
D1 0.75000000 sec  
d11 0.03000000 sec  
d12 0.00002000 sec

===== CHANNEL f1 =====  
NUC1 13C  
P1 6.26 usec  
PL1 -1.00 dB  
SF01 100.6239378 MHz

===== CHANNEL f2 =====  
CPDPRG2 waltz16  
NUC2 1H  
PCPD2 100.00 usec  
PL2 -3.00 dB  
PL12 17.50 dB  
PL13 19.00 dB  
SF02 400.1318006 MHz

F2 - Processing parameters  
SI 32768  
SF 100.6127708 MHz  
WDW EM  
SSB 0  
LB 1.00 Hz  
GB 0  
PC 1.40

1D NMR plot parameters  
CX 22.00 cm  
CY 14.76 cm  
F1P 200.000 ppm  
F1 20122.55 Hz  
F2P -1.000 ppm  
F2 -100.61 Hz  
PPMCH 9.13636 ppm/  
HZCM 919.23480 Hz/c

0.17

S13

NL: 9.06E5  
TIC F: {0,0}  
corona sid-  
det=1212.0  
100.00-100  
Vial73

# Mass spectrum of Compound 10

0.19

NL: 5.66E7  
TIC F: {0,1}  
corona sid-  
det=1212.0  
100.00-100  
Vial73

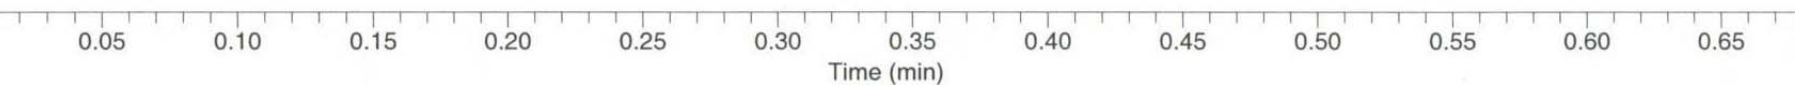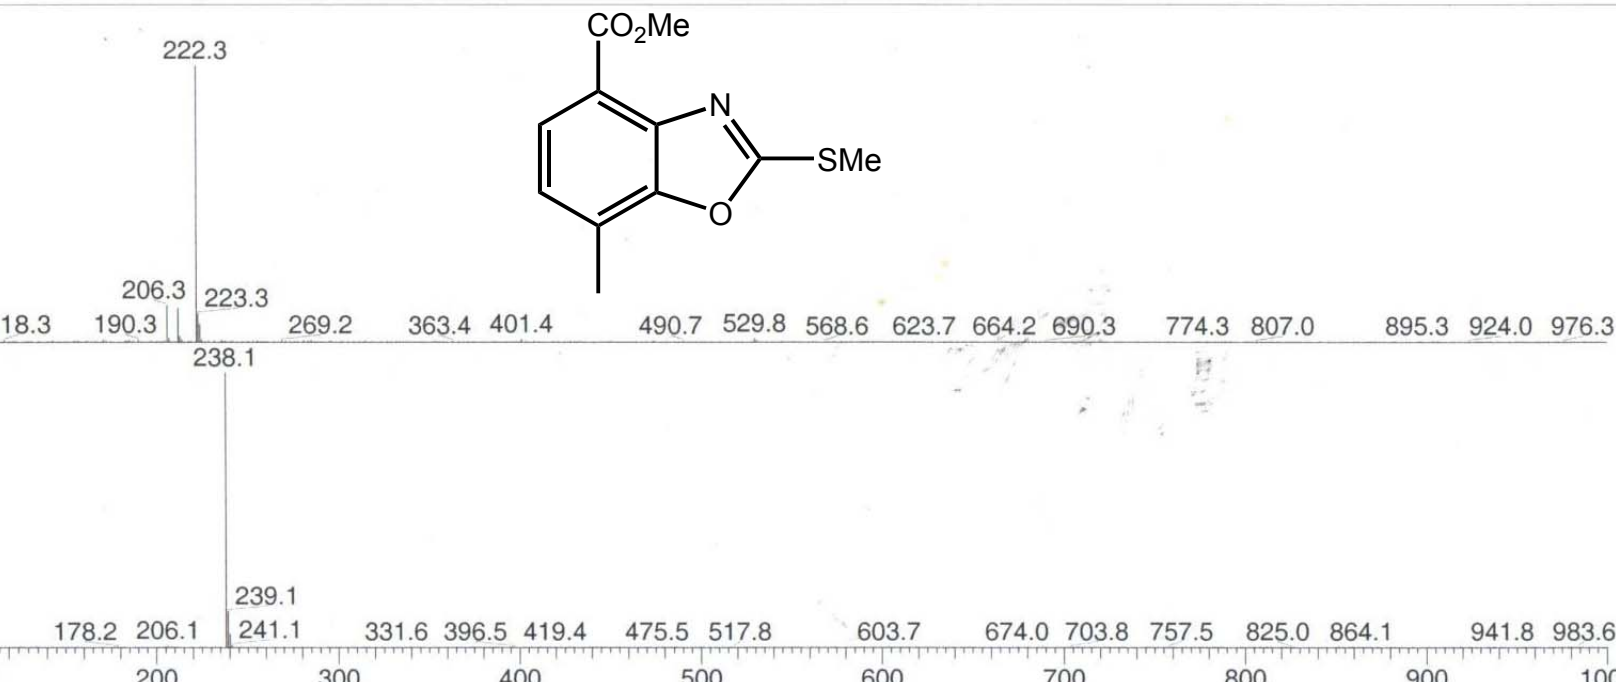

Vial73#6-11 RT: 0.12-0  
SB: 2 0.54-0.61 NL: 3.4  
{0,0} - c APCI corona si  
det=1212.00 Full ms [  
100.00-1000.00]

Vial73#6-11 RT: 0.10-0  
SB: 2 0.54-0.61 NL: 5.2  
{0,1} + c APCI corona si  
det=1212.00 Full ms [  
100.00-1000.00]

S14

<sup>1</sup>H NMR spectrum of Compound 11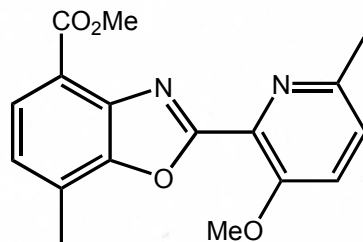

7.989  
7.969  
7.385  
7.364  
7.321  
7.299  
7.268  
7.258  
7.256  
7.239  
7.237

4.047  
4.025

2.681  
2.680  
2.640

1.873

-0.000

Current Data Parameters  
NAME cr087  
EXPNO 1  
PROCNO 1

F2 - Acquisition Parameters  
Date\_ 20050209  
Time 10.12  
INSTRUM spect  
PROBHD 5 mm BBO BB-1H  
PULPROG zg30  
TD 65536  
SOLVENT DMSO  
NS 32  
DS 2  
SWH 8389.262 Hz  
FIDRES 0.128010 Hz  
AQ 3.9059956 sec  
RG 287.4  
DW 59.600 usec  
DE 10.00 usec  
TE 300.0 K  
D1 2.00000000 sec

===== CHANNEL f1 =====  
NUC1 1H  
P1 9.50 usec  
PL1 -3.00 dB  
SF01 400.1334011 MHz

F2 - Processing parameters  
SI 32768  
SF 400.130063 MHz  
WDW EM  
SSB 0  
LB 0.30 Hz  
GB 0  
PC 1.00

1D NMR plot parameters  
CX 22.00 cm  
CY 12.88 cm  
F1P 10.000 ppm  
F1 4001.30 Hz  
F2P -1.000 ppm  
F2 -400.13 Hz  
PPMCM 0.50000 ppm/cm  
HZCM 200.06500 Hz/cm

1.0000  
3.0069  
3.1147

2.0427  
1.0315  
3.0480  
3.0699

3.0069  
3.1147

3.0480  
3.0699

S15

<sup>13</sup>C NMR spectrum of Compound 11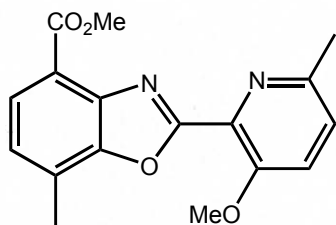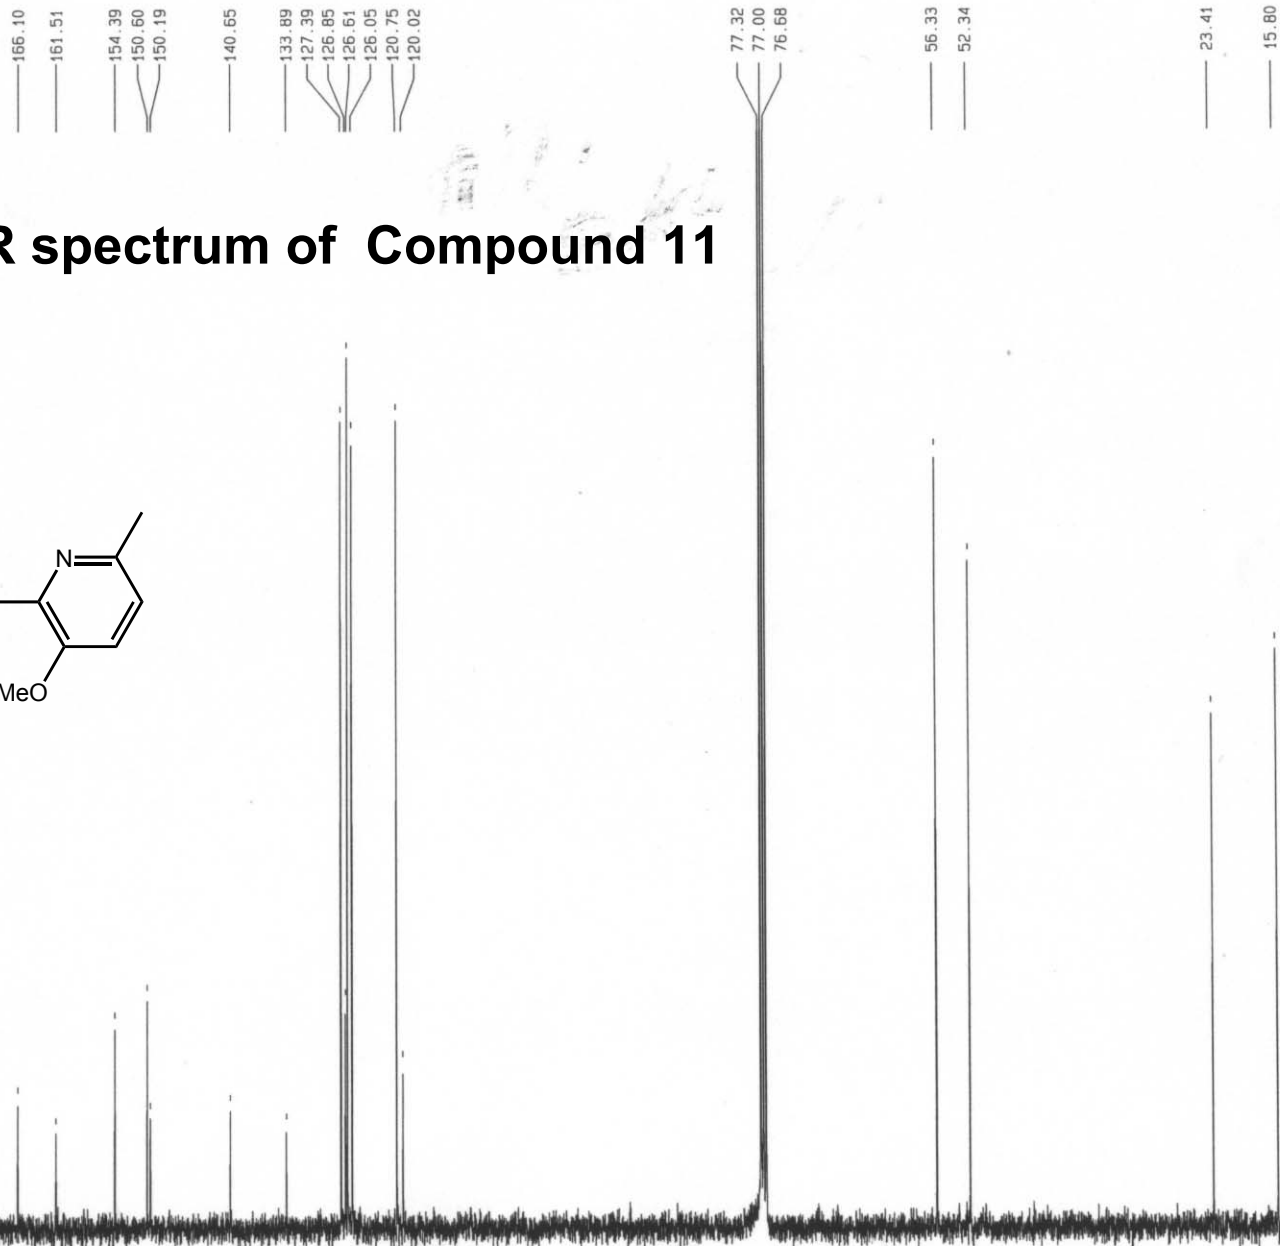

Current Data Parameters  
 NAME cr087  
 EXPNO 6  
 PROCNO 1

F2 - Acquisition Parameters  
 Date\_ 20050209  
 Time 14.32  
 INSTRUM spect  
 PROBHD 5 mm BBO BB-1H  
 PULPROG zgpg  
 TD 65536  
 SOLVENT cdc13  
 NS 2000  
 DS 0  
 SWH 26178.010 Hz  
 FIDRES 0.399445 Hz  
 AQ 1.2517875 sec  
 RG 9195.2  
 DW 19.100 usec  
 DE 6.50 usec  
 TE 300.0 K  
 D1 0.75000000 sec  
 d11 0.03000000 sec  
 d12 0.00002000 sec

===== CHANNEL f1 =====  
 NUC1 13C  
 P1 6.26 usec  
 PL1 -1.00 dB  
 SF01 100.6248442 MHz

===== CHANNEL f2 =====  
 CPDPRG2 waltz16  
 NUC2 1H  
 PCPD2 100.00 usec  
 PL2 -3.00 dB  
 PL12 17.50 dB  
 PL13 19.00 dB  
 SF02 400.1318100 MHz

F2 - Processing parameters  
 SI 32768  
 SF 100.6127702 MHz  
 WDW EM  
 SSB 0  
 LB 1.00 Hz  
 GB 0  
 PC 1.40

1D NMR plot parameters  
 CX 22.00 cm  
 CY 22.51 cm  
 F1P 200.000 ppm  
 F1 20122.55 Hz  
 F2P -1.000 ppm  
 F2 -100.61 Hz  
 PPMCM 9.13636 ppm/  
 HZCM 919.23480 Hz/c

**S16**

# Mass spectrum of Compound 11

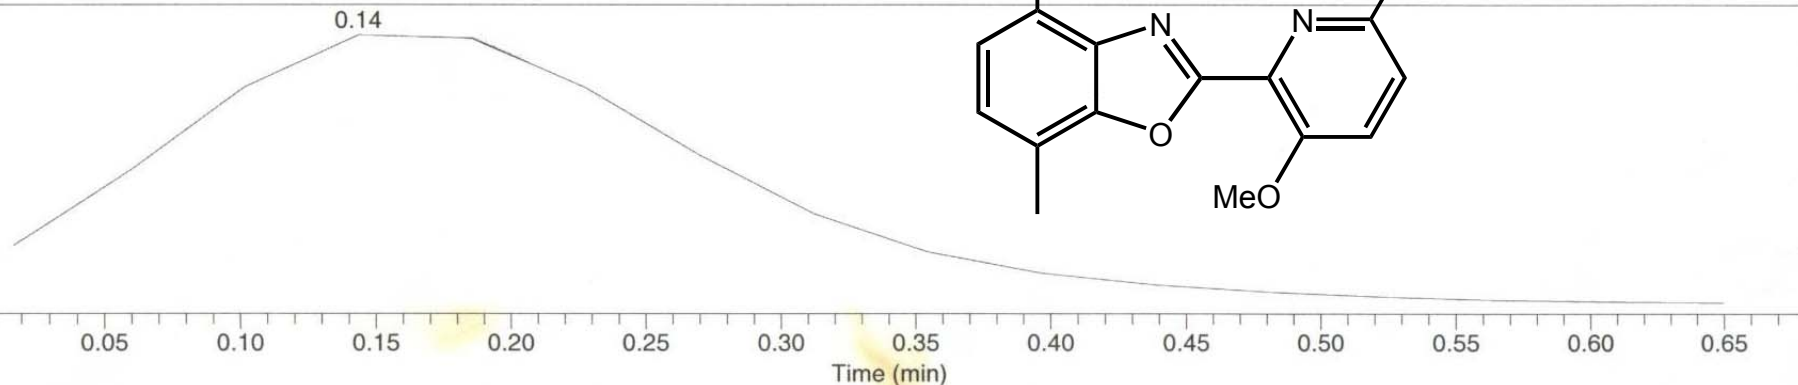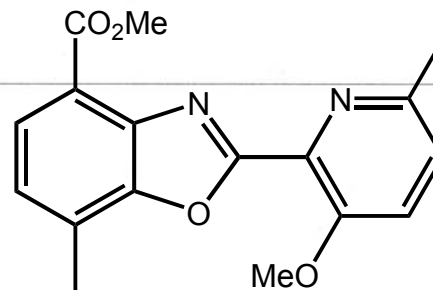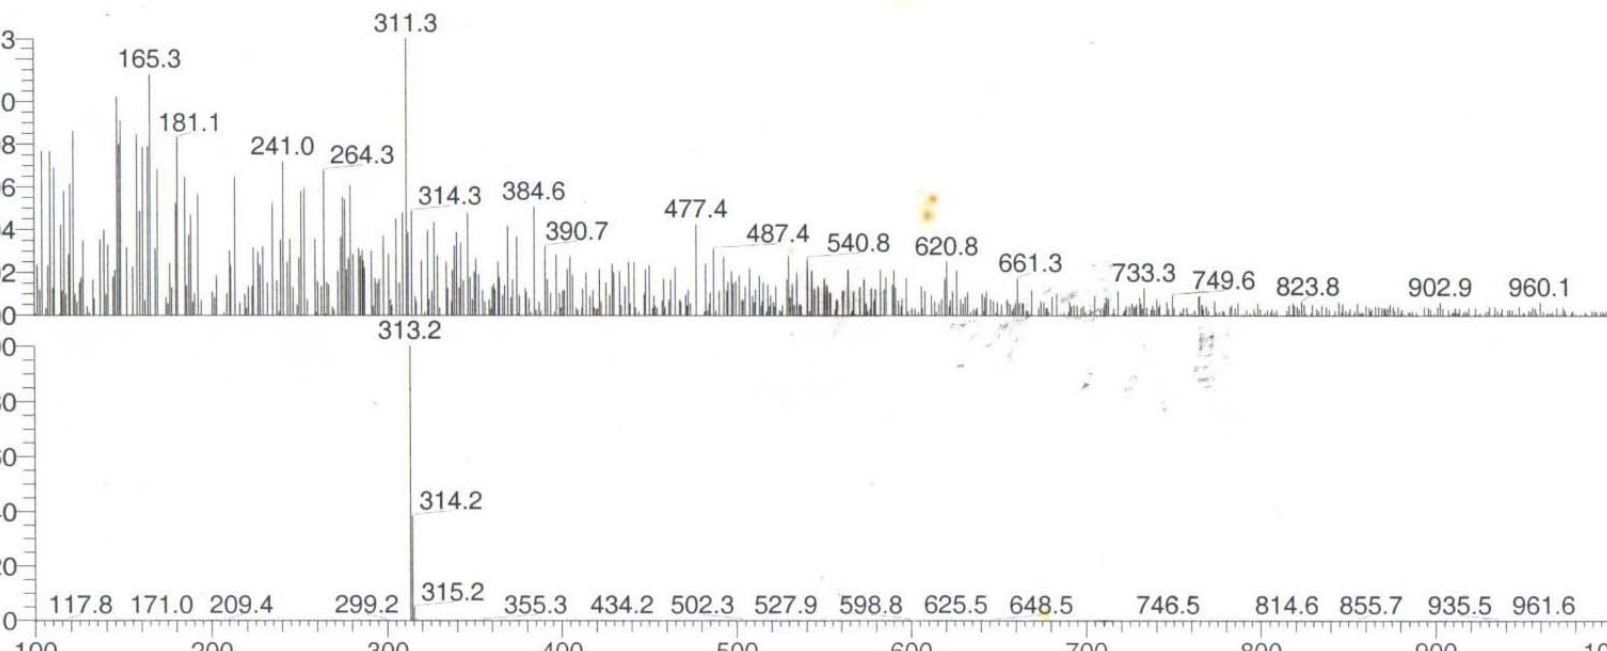

Vial26#6-11 RT: 0.12-0.14  
SB: 2 0.54-0.61 NL: 2.1  
{0,0} - c APCI corona si  
det=1212.00 Full ms [  
100.00-1000.00]

Vial26#6-11 RT: 0.10-0.12  
SB: 2 0.54-0.61 NL: 1.6  
{0,1} + c APCI corona si  
det=1212.00 Full ms [  
100.00-1000.00]
